# Supplementary material
Source: MDPI journal article supplement (https://www.mdpi.com/1999-4907/6/9/2941)
Supplement: s1 [file s1]

Supplementary Data

**Figure S1.** Seasonal patterns of (**a**–**c**) inorganic N concentrations in bulk soil, (**d**–**f**) those of ion exchange resin (IER); (**g**,**h**) net N transformation rates; and (**i**) soil water content (SWC) and temperature in an upland pine forest (UPF) of different stand densities and a bottomland alder forest (BAF) with different soil moisture conditions.

**Figure S2.** Relationships between soil temperature and (**a**) net N mineralization rate and (**b**) net nitrification rate in an upland pine forest (UPF) of different stand densities and a bottomland alder forest (BAF) with different soil moisture conditions.

© 2015 by the authors; licensee MDPI, Basel, Switzerland. This article is an open access article distributed under the terms and conditions of the Creative Commons Attribution license (http://creativecommons.org/licenses/by/4.0/).
